# Supplementary material
Source: Springer Nature journal article supplement (https://www.springermedizin.de/resource/supplementary/12891_2014_2196_MOESM5_ESM.pdf/9509598)

# Total hip replacement

## 24 hours post surgery

### Pain at rest

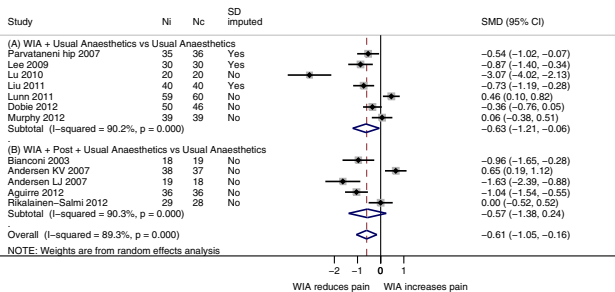

### Pain during activity

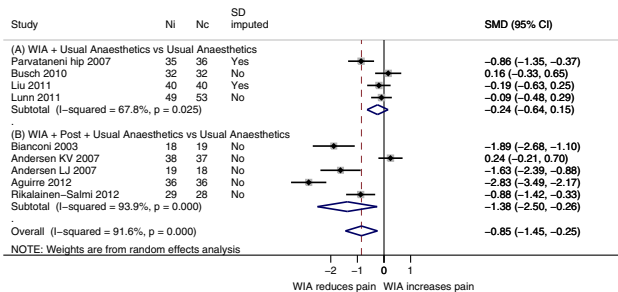

## 48 hours post surgery

### Pain at rest

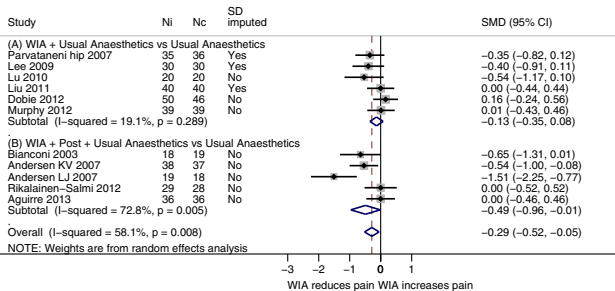

### Pain during activity

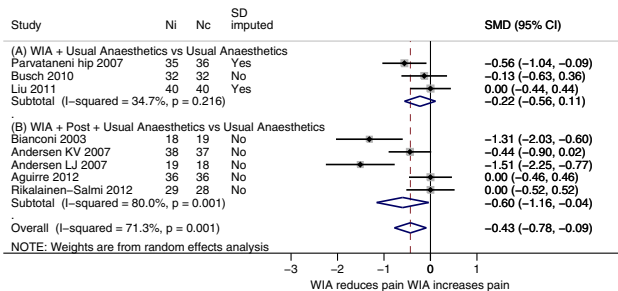

Supplement: MOESM5 [file 9509598]
